# Supplementary material for: The cell specificity of gene expression in the response to heat stress in corals
Source: Oxford University Press journal article supplement (doi:10.1242/jeb.155275), 2017-01-01
Supplement: jeb155275supp.pdf [file jeb155275supp.pdf]

**Table S1:** Information on the samples that we used in this study including symbiont type and treatment.

[Click here to Download Table S1](#)

**Table S2:** Primers used in this study to produce in situ hybridization probes.

[Click here to Download Table S2](#)
